# Supplementary material
Source: Frontiers journal article supplement (https://www.frontiersin.org/articles/294213)
Supplement: Table_1.pdf [file Table_1.pdf]

*Supplementary Material*

**Persistency of Cannabis use Predicts Violence following Acute  
Psychiatric Discharge**

Jules R. Dugré; Laura Dellazizzo; Charles-Édouard Giguère; Stéphane Potvin\*; Alexandre Dumais\*

\* **Correspondence:** alexandre.dumais@umontreal.ca; stephane.potvin@umontreal.ca

**1 Supplementary Data: Tables**

**SUPPLEMENTARY TABLE 1**

**GEE with binomial distribution (log-link) and an unstructured working correlation on subsequent violence with variables entered one at a time (n=592)**

|                                               | <sup>A</sup> <b>OR (95% CI)</b> | <b>P-value</b> |
|-----------------------------------------------|---------------------------------|----------------|
| Cannabis <sup>B</sup>                         |                                 |                |
| Use at 1 time-point                           | 1.60 (1.19-2.15)                | 0.002          |
| Use at 2 time-points                          | 1.91 (1.27-2.86)                | 0.002          |
| Use at 3 time-points                          | 2.72 (1.66-4.46)                | <0.001         |
| Use at 4 time-points                          | 4.04 (1.99-8.19)                | <0.001         |
| Cocaine <sup>B</sup>                          |                                 |                |
| Use at 1 time-point                           | 1.56 (1.12-2.17)                | 0.009          |
| Use at 2 time-points                          | 1.19 (0.75-1.90)                | 0.469          |
| Use at 3 time-points                          | 2.27 (1.49-4.80)                | 0.001          |
| Use at 4 time-points                          | 1.89 (0.75-4.76)                | 0.177          |
| Alcohol <sup>B</sup>                          |                                 |                |
| Use at 1 time-point                           | 1.42 (1.07-1.89)                | 0.015          |
| Use at 2 time-points                          | 1.44 (1.02-2.04)                | 0.039          |
| Use at 3 time-points                          | 1.99 (1.30-3.04)                | 0.002          |
| Use at 4 time-points                          | 3.39 (1.99-5.78)                | <0.001         |
| Psychopathic traits <sup>C</sup>              | 1.66 (1.37-2.01)                | <0.001         |
| BIS-11                                        | 1.02 (1.01-1.03)                | <0.001         |
| Age                                           | 0.97 (0.95-0.99)                | 0.002          |
| Age at 1st Hospitalization                    | 0.98 (0.96-1.00)                | 0.047          |
| Men <sup>D</sup>                              | 0.87 (0.66-1.13)                | 0.293          |
| Caucasian <sup>E</sup>                        | 0.78 (0.58-1.04)                | 0.087          |
| Schizophrenia-Spectrum Disorders <sup>F</sup> | 0.62 (0.45-0.87)                | 0.006          |
| Affective Disorders <sup>F</sup>              | 0.96 (0.73-1.25)                | 0.744          |

*Note.* BIS-11 : *Baratt Impulsiveness Scale*.

<sup>A</sup> Controlling for the effect of time

<sup>B</sup> Ordinal variable (reference is no use of the substance across time-points)

- 
- <sup>C</sup> Ordinal variable (reference group is low psychopathic traits: see (48))
- <sup>D</sup> Women as reference
- <sup>E</sup> Other ethnicities as reference
- <sup>F</sup> Dichotomous variable (Presence/Absence)

**SUPPLEMENTARY TABLE 2.**

**GEE with binomial distribution (log-link) and an unstructured working correlation on subsequent violence adjusted for potential confounders (n=592)**

|                                               | <b><sup>A</sup>OR (95% CI)</b> | <b>P-value</b> |
|-----------------------------------------------|--------------------------------|----------------|
| Cannabis use <sup>B</sup>                     |                                |                |
| Use at 1 time-point                           | 1.32 (0.94-1.86)               | 0.112          |
| Use at 2 time-points                          | 1.71 (1.08-2.70)               | 0.023          |
| Use at 3 time-points                          | 2.08 (1.16-3.74)               | 0.025          |
| Use at 4 time-points                          | 2.44 (1.06-5.63)               | 0.036          |
| Cocaine use <sup>B</sup>                      |                                |                |
| Use at 1 time-point                           | 1.04 (0.71-1.53)               | 0.842          |
| Use at 2 time-points                          | 0.68 (0.41-1.14)               | 0.154          |
| Use at 3 time-points                          | 1.16 (0.59-2.28)               | 0.674          |
| Use at 4 time-points                          | 0.59 (0.21-1.63)               | 0.304          |
| Alcohol <sup>B</sup>                          |                                |                |
| Use at 1 time-point                           | 1.13 (0.84-1.52)               | 0.420          |
| Use at 2 time-points                          | 1.09 (0.74-1.61)               | 0.656          |
| Use at 3 time-points                          | 1.36 (0.84-2.21)               | 0.209          |
| Use at 4 time-points                          | 2.32 (1.25-4.28)               | 0.007          |
| Psychopathic traits <sup>C</sup>              | 1.47 (1.19-1.81)               | <0.001         |
| BIS-11                                        | 1.01 (1.00-1.02)               | 0.010          |
| Age                                           | 0.99 (0.96-1.01)               | 0.349          |
| Age at 1st Hospitalization                    | 0.99 (0.97-1.01)               | 0.302          |
| Men <sup>D</sup>                              | 0.73 (0.56-0.96)               | 0.025          |
| Caucasian <sup>E</sup>                        | 0.81 (0.59-1.10)               | 0.169          |
| Schizophrenia-Spectrum Disorders <sup>F</sup> | 0.59 (0.38-0.92)               | 0.019          |
| Affective Disorders <sup>F</sup>              | 0.85 (0.60-1.20)               | 0.343          |

*Note.* BIS-11: Baratt Impulsiveness Scale.

<sup>A</sup> Controlling for the effects of time

<sup>B</sup> Ordinal variable (reference is no use of the substance across time-points)

- 
- <sup>C</sup> Ordinal variable (reference group is low psychopathic traits: see (48))
- <sup>D</sup> Women as reference
- <sup>E</sup> Other ethnicities as reference
- <sup>F</sup> Dichotomous variable (Presence/Absence)
